# Supplementary material for: Paper-based ELISA diagnosis technology for human brucellosis based on a multiepitope fusion protein
Source: PubMed Central journal article supplement (PMC8396774; doi:10.1371/journal.pntd.0009695), 2021-08-17

# PLOS Neglected Tropical Diseases

## Paper-based ELISA diagnosis technology for human brucellosis based on a multiepitope fusion protein --Manuscript Draft--

|                                                                                                                                                                                                                                                                                                                                                                                                                                                                                               |                                                                                                                                                                                                                                                                                                                                                                                                                                                                                                                                                                                                                                                                                                                                                                                                                                                                                                                                                                                                                                                                                                                                                                                                                                                                                                                                                                                                                                                                                                                                                                                                                                                                                                                                                                                                                                                                                                                                                                                                                                                                                                    |
|-----------------------------------------------------------------------------------------------------------------------------------------------------------------------------------------------------------------------------------------------------------------------------------------------------------------------------------------------------------------------------------------------------------------------------------------------------------------------------------------------|----------------------------------------------------------------------------------------------------------------------------------------------------------------------------------------------------------------------------------------------------------------------------------------------------------------------------------------------------------------------------------------------------------------------------------------------------------------------------------------------------------------------------------------------------------------------------------------------------------------------------------------------------------------------------------------------------------------------------------------------------------------------------------------------------------------------------------------------------------------------------------------------------------------------------------------------------------------------------------------------------------------------------------------------------------------------------------------------------------------------------------------------------------------------------------------------------------------------------------------------------------------------------------------------------------------------------------------------------------------------------------------------------------------------------------------------------------------------------------------------------------------------------------------------------------------------------------------------------------------------------------------------------------------------------------------------------------------------------------------------------------------------------------------------------------------------------------------------------------------------------------------------------------------------------------------------------------------------------------------------------------------------------------------------------------------------------------------------------|
| <b>Manuscript Number:</b>                                                                                                                                                                                                                                                                                                                                                                                                                                                                     | PNTD-D-21-00330R1                                                                                                                                                                                                                                                                                                                                                                                                                                                                                                                                                                                                                                                                                                                                                                                                                                                                                                                                                                                                                                                                                                                                                                                                                                                                                                                                                                                                                                                                                                                                                                                                                                                                                                                                                                                                                                                                                                                                                                                                                                                                                  |
| <b>Full Title:</b>                                                                                                                                                                                                                                                                                                                                                                                                                                                                            | Paper-based ELISA diagnosis technology for human brucellosis based on a multiepitope fusion protein                                                                                                                                                                                                                                                                                                                                                                                                                                                                                                                                                                                                                                                                                                                                                                                                                                                                                                                                                                                                                                                                                                                                                                                                                                                                                                                                                                                                                                                                                                                                                                                                                                                                                                                                                                                                                                                                                                                                                                                                |
| <b>Short Title:</b>                                                                                                                                                                                                                                                                                                                                                                                                                                                                           | P-ELISA for diagnosing human brucellosis                                                                                                                                                                                                                                                                                                                                                                                                                                                                                                                                                                                                                                                                                                                                                                                                                                                                                                                                                                                                                                                                                                                                                                                                                                                                                                                                                                                                                                                                                                                                                                                                                                                                                                                                                                                                                                                                                                                                                                                                                                                           |
| <b>Article Type:</b>                                                                                                                                                                                                                                                                                                                                                                                                                                                                          | Research Article                                                                                                                                                                                                                                                                                                                                                                                                                                                                                                                                                                                                                                                                                                                                                                                                                                                                                                                                                                                                                                                                                                                                                                                                                                                                                                                                                                                                                                                                                                                                                                                                                                                                                                                                                                                                                                                                                                                                                                                                                                                                                   |
| <b>Keywords:</b>                                                                                                                                                                                                                                                                                                                                                                                                                                                                              | brucellosis; B cell epitope; nano-zinc oxide; p-ELISA; serological diagnosis                                                                                                                                                                                                                                                                                                                                                                                                                                                                                                                                                                                                                                                                                                                                                                                                                                                                                                                                                                                                                                                                                                                                                                                                                                                                                                                                                                                                                                                                                                                                                                                                                                                                                                                                                                                                                                                                                                                                                                                                                       |
| <b>Abstract:</b>                                                                                                                                                                                                                                                                                                                                                                                                                                                                              | <p><b>Background:</b> Brucellosis, as a serious zoonotic infectious disease, has been recognized as a re-emerging disease in the developing countries worldwide. In china, the incidence of brucellosis is increasing each year, seriously threatening the health of humans as well as animal populations. Despite a quite number of diagnostic methods currently being used for brucellosis, innovative technologies are still needed for its rapid and accurate diagnosis, especially in area where traditional diagnostic is unavailable.</p> <p><b>Methodology/Principal Findings:</b> In this study, a total of 22 B cell linear epitopes were predicted from five <i>Brucella</i> outer membrane proteins (OMPs) using an immunoinformatic approach. These epitopes were then chemically synthesized, and with the method of indirect ELISA (iELISA), each of them displayed a certain degree of capability in identifying human brucellosis positive sera. Subsequently, a fusion protein consisting of the 22 predicted epitopes was prokaryotically expressed and used as diagnostic antigen in a newly established brucellosis testing method, nano-ZnO modified paper-based ELISA (nano-p-ELISA). According to the verifying test using a collection of sera collected from brucellosis and non-brucellosis patients, the sensitivity and specificity of multiepitope based nano-p-ELISA were 92.38% and 98.35% respectively. The positive predictive value was 98.26% and the negative predictive value was 91.67%. The multiepitope based fusion protein also displayed significantly higher specificity than <i>Brucella</i> lipopolysaccharide (LPS) antigen.</p> <p><b>Conclusions:</b> B cell epitopes are important candidates for serologically testing brucellosis. Multiepitope fusion protein based nano-p-ELISA displayed significantly sensitivity and specificity compared to <i>Brucella</i> LPS antigen. The strategy applied in this study will be helpful to develop rapid and accurate diagnostic method for brucellosis in human as well as animal populations.</p> |
| <b>Additional Information:</b>                                                                                                                                                                                                                                                                                                                                                                                                                                                                |                                                                                                                                                                                                                                                                                                                                                                                                                                                                                                                                                                                                                                                                                                                                                                                                                                                                                                                                                                                                                                                                                                                                                                                                                                                                                                                                                                                                                                                                                                                                                                                                                                                                                                                                                                                                                                                                                                                                                                                                                                                                                                    |
| <b>Question</b>                                                                                                                                                                                                                                                                                                                                                                                                                                                                               | <b>Response</b>                                                                                                                                                                                                                                                                                                                                                                                                                                                                                                                                                                                                                                                                                                                                                                                                                                                                                                                                                                                                                                                                                                                                                                                                                                                                                                                                                                                                                                                                                                                                                                                                                                                                                                                                                                                                                                                                                                                                                                                                                                                                                    |
| <b>Financial Disclosure</b><br><br>Enter a financial disclosure statement that describes the sources of funding for the work included in this submission. Review the <a href="#">submission guidelines</a> for detailed requirements. View published research articles from <a href="#">PLOS NTDs</a> for specific examples.<br><br>This statement is required for submission and <b>will appear in the published article</b> if the submission is accepted. Please make sure it is accurate. | This work was supported by the National Natural Science Foundation of China (Grant number 81802101 , received by Dehui Yin). The funders had no role in study design, data collection and analysis, decision to publish, or preparation of the manuscript.                                                                                                                                                                                                                                                                                                                                                                                                                                                                                                                                                                                                                                                                                                                                                                                                                                                                                                                                                                                                                                                                                                                                                                                                                                                                                                                                                                                                                                                                                                                                                                                                                                                                                                                                                                                                                                         |

### Unfunded studies

Enter: *The author(s) received no specific funding for this work.*

### Funded studies

Enter a statement with the following details:

- Initials of the authors who received each award
- Grant numbers awarded to each author
- The full name of each funder
- URL of each funder website
- Did the sponsors or funders play any role in the study design, data collection and analysis, decision to publish, or preparation of the manuscript?
- **NO** - Include this sentence at the end of your statement: *The funders had no role in study design, data collection and analysis, decision to publish, or preparation of the manuscript.*
- **YES** - Specify the role(s) played.

\* typeset

### Competing Interests

Use the instructions below to enter a competing interest statement for this submission. On behalf of all authors, disclose any [competing interests](#) that could be perceived to bias this work—acknowledging all financial support and any other relevant financial or non-financial competing interests.

This statement **will appear in the published article** if the submission is accepted. Please make sure it is accurate. View published research articles from [PLOS NTDs](#) for specific examples.

The authors have declared that no competing interests exist.

**NO authors have competing interests**

Enter: *The authors have declared that no competing interests exist.*

**Authors with competing interests**

Enter competing interest details beginning with this statement:

*I have read the journal's policy and the authors of this manuscript have the following competing interests: [insert competing interests here]*

\* typeset

This statement is **required** for submission and **will appear in the published article** if the submission is accepted. Please make sure it is accurate and that any funding sources listed in your Funding Information later in the submission form are also declared in your Financial Disclosure statement.

**Data Availability**

Authors are required to make all data underlying the findings described fully available, without restriction, and from the time of publication. PLOS allows rare exceptions to address legal and ethical concerns. See the [PLOS Data Policy](#) and [FAQ](#) for detailed information.

Yes - all data are fully available without restriction

A Data Availability Statement describing where the data can be found is required at submission. Your answers to this question constitute the Data Availability Statement and **will be published in the article**, if accepted.

**Important:** Stating 'data available on request from the author' is not sufficient. If your data are only available upon request, select 'No' for the first question and explain your exceptional situation in the text box.

Do the authors confirm that all data underlying the findings described in their manuscript are fully available without restriction?

**Describe where the data may be found in full sentences. If you are copying our sample text, replace any instances of XXX with the appropriate details.**

- If the data are **held or will be held in a public repository**, include URLs, accession numbers or DOIs. If this information will only be available after acceptance, indicate this by ticking the box below. For example: *All XXX files are available from the XXX database (accession number(s) XXX, XXX).*
- If the data are all contained **within the manuscript and/or Supporting Information files**, enter the following: *All relevant data are within the manuscript and its Supporting Information files.*
- If neither of these applies but you are able to provide **details of access elsewhere**, with or without limitations, please do so. For example:

All relevant data are within the manuscript and its Supporting Information files.

*Data cannot be shared publicly because of [XXX]. Data are available from the XXX Institutional Data Access / Ethics Committee (contact via XXX) for researchers who meet the criteria for access to confidential data.*

*The data underlying the results presented in the study are available from (include the name of the third party and contact information or URL).*

- This text is appropriate if the data are owned by a third party and authors do not have permission to share the data.

\* typeset

Additional data availability information:



23 E-mail: [jianghai@icdc.cn](mailto:jianghai@icdc.cn).

24 School of Public Health, Xuzhou Medical University, No. 129 Tongshan Road,

25 Xuzhou, 221004, China. E-mail: [xiaopangpeng@126.com](mailto:xiaopangpeng@126.com)

26

27

28 **Abstract**

29 **Background:** Brucellosis, as a serious zoonotic infectious disease, has been  
30 recognized as a re-emerging disease in the developing countries worldwide. In china,  
31 the incidence of brucellosis is increasing each year, seriously threatening the health of  
32 humans as well as animal populations. Despite a quite number of diagnostic methods  
33 currently being used for brucellosis, innovative technologies are still needed for its  
34 rapid and accurate diagnosis, especially in area where traditional diagnostic is  
35 unavailable.

36 **Methodology/Principal Findings:** In this study, a total of 22 B cell linear epitopes  
37 were predicted from five *Brucella* outer membrane proteins (OMPs) using an  
38 immunoinformatic approach. These epitopes were then chemically synthesized, and  
39 with the method of indirect ELISA (iELISA), each of them displayed a certain degree  
40 of capability in identifying human brucellosis positive sera. Subsequently, a fusion  
41 protein consisting of the 22 predicted epitopes was prokaryotically expressed and  
42 used as diagnostic antigen in a newly established brucellosis testing method,  
43 nano-ZnO modified paper-based ELISA (nano-p-ELISA). According to the verifying  
44 test using a collection of sera collected from brucellosis and non-brucellosis patients,  
45 the sensitivity and specificity of multiepitope based nano-p-ELISA were 92.38% and  
46 98.35% respectively. The positive predictive value was 98.26% and the negative  
47 predictive value was 91.67%. The multiepitope based fusion protein also displayed  
48 significantly higher specificity than *Brucella* lipopolysaccharide (LPS) antigen.

49 **Conclusions:** B cell epitopes are important candidates for serologically testing



50 brucellosis. Multiepitope fusion protein based nano-p-ELISA displayed significantly  
51 sensitivity and specificity compared to *Brucella* LPS antigen. The strategy applied in  
52 this study will be helpful to develop rapid and accurate diagnostic method for  
53 brucellosis in human as well as animal populations.

54 **Keywords:** brucellosis; B cell epitope; nano-zinc oxide; p-ELISA; serological  
55 diagnosis

#### 56 **Author Summary**

57 Brucellosis is one of the most important zoonosis in the world and has caused  
58 tremendous economic losses in agriculture and animal husbandry in many countries.  
59 Developing rapid, sensitive and specific diagnostic methods is very important for  
60 early detection and treatment of brucellosis patients. In this study, a novel diagnostic  
61 technique, nano-ZnO modified paper ELISA, was established. The antigen used in  
62 this technique was a fusion protein containing multiple B cell epitopes, which were  
63 predicted from *Brucella* major outer membrane proteins such as Bp26, Omp31,  
64 Omp16, Omp2b and Omp25. Comparing to traditional LPS antigen, this multiepitope  
65 based antigen displayed considerably higher sensitivity and higher specificity in  
66 laboratory. With the strategy described in this paper, more efficient epitopes and  
67 protein antigen can be identified in the future. Currently, LPS antigen is only prepared  
68 from live *Brucella*, while protein antigen can be produced in large quantities in  
69 prokaryotic expression system. In addition to nano-p-ELISA, this protein antigen can  
70 also be used for development other methods such as fluorescent polarization assay  
71 (FPA) and immunochromatographic assay (ICA) to meet the varied demand for

72 brucellosis testing.

73

74 **Introduction**

75 Brucellosis is a reemerging zoonotic infectious disease. It not only seriously  
76 threatens the health of the people but also causes huge economic losses to animal  
77 husbandry industry. In human, brucellosis often manifests multiple symptoms and a  
78 long course of disease. So it is often misdiagnosed and causes increased cost of  
79 treatment and waste of medical resources [1]. Therefore, a rapid and accurate testing  
80 technology is very important for brucellosis diagnosis and subsequent treatment.

81 Currently, diagnostic methods for brucellosis include bacterial isolation, specific  
82 antibody detection and amplification of specific DNA fragments(PCR or qPCR) [2,3].  
83 Bacterial isolation needs biosafety level 3 laboratory, and usually takes several  
84 weeks[4]. PCR or qPCR are fast and having higher sensitivity and specificity, but  
85 nucleic acid contamination often causes false positive result so that expensive  
86 facilities must be needed to guarantee the accuracy of testing [5]. On the other hand,  
87 antibody detection is the most popularly used method for testing brucellosis as they  
88 are easy to handle and suitable for most laboratories. There are several serological  
89 methods popularly used for antibody detection, including the agglutination test,  
90 complement fixation test (CFT), enzyme-linked immunosorbent assay (ELISA),  
91 immunochromatographic assay (ICA) and fluorescence polarization assay (FPA)[6].  
92 All these methods are based on detecting antibody targeting for lipopolysaccharide  
93 (LPS). Although LPS is a major immunogen arousing high level of antibody titer, it  
94 contains the common epitope with other gram negative bacillus like *Yersinia* O:9 and  
95 *Escherichia* O:157, which greatly reduces its specificity in testing brucellosis.  
96 Moreover, as LPS is obtained only through culturing *Brucella* in high-level biosafety

97 facilities, it is not available to most of diagnostic kit manufacturers. Thus, seeking for  
98 new antigen to replace LPS is critical for developing easily available brucellosis  
99 testing kits.

100 In our previous study, the out membrane proteins such as Bp26 and Omp31  
101 demonstrated considerable efficacy in detecting human brucellosis sera[7]. In this  
102 study, the B cell epitopes from five out membrane proteins were predicted and  
103 synthesized for the purpose of designing a more effective antigen. Paper-based  
104 enzyme-linked immunosorbent assay (p-ELISA) is an emerging technology. Due to  
105 the small reagent required and special equipment independence, it has attracted  
106 increasing attention from diagnostic reagent developers[8-10]. Here, using a  
107 prokaryotically expressed protein consisting of multiple B cell epitopes, a nano-ZnO  
108 modified p-ELISA (nano-p-ELISA) was established. The efficiency of this new  
109 method in detecting human brucellosis was evaluated against a collection of human  
110 sera. Hopefully, the epitope based protein can be applied in development of other fast  
111 and low cost diagnostic methods for brucellosis.

## 112 **Methods**

### 113 **Human serum samples**

114 121 human brucellosis sera were gifted by the School of Public Health of Jilin  
115 University. 90 negative control sera were collected by Infection Department of the  
116 First Clinical Hospital of Jilin University, including 50 \***healthy sera** and 40 patient  
117 sera confirmed by blood culture to be infected with other pathogens(S1 Table). All  
118 experiments were approved by the Animal Care and Ethics Committee of Xuzhou

119 Medical University.

## 120 **B cell epitope prediction and synthesis**

121 The amino acid sequences of *Brucella* out membrane protein Bp26, Omp2b,  
122 Omp16, Omp25 and Omp31 were download from NCBI website  
123 (<https://www.ncbi.nlm.nih.gov/protein/>). *Brucella* species and protein accession  
124 numbers were listed in supplementary S2 Table. The conserved amino acid sequences  
125 of these proteins were used to predict B cell epitopes using BepiPred tool in IEDB  
126 (<http://tools.iedb.org/bcell/>). Prediction threshold is 0.350(default value), above this  
127 threshold is possible epitope. Peptides longer than 6 amino acids were assumed as  
128 effective epitope and selected. Each of selected B cell epitope was chemically  
129 synthesized and coupled to keyhole limpet hemocyanin (KLH) in Sangon Biotech  
130 Company (Shanghai, China). The purity of each polypeptide-KLH was more than  
131 90%.

## 132 **Evaluation of B cell epitopes**

133 121 human brucellosis positive sera were used to verify the diagnostic effect of  
134 predicted epitopes by indirect ELISA (iELISA). Each peptide-KLH was diluted with  
135 carbonate buffer (pH = 9.6) to final concentrations of 30 µg/mL. 100 µL of  
136 peptide-KLH was added to 96-well plate (Corning, USA) and incubated overnight at  
137 4°C. 300 µL blocking solution (5% skimmed milk in PBS) was then added to plate  
138 and incubated at 37°C for 1 h. After washing 3 times with PBST, 100 µL of 1:400  
139 diluted serum was added and incubated at 37°C for 1 h. After washing 3 times with  
140 PBST, 1:5000 diluted HRP-labeled protein G (Thermo, USA) was added to plate and

141 incubated at room temperature for 30 min. In the coloring step, 100  $\mu$ L of TMB  
142 substrate solution was added to each well and incubated for 15 min at room  
143 temperature. Coloring was terminated by adding 50  $\mu$ L of stopping solution (2 M  
144  $H_2SO_4$ ). The optical density was measured at 450 nm ( $OD_{450}$ ) using ELISA plate  
145 reader (BioTek, USA). At the same time, KLH (30  $\mu$ g/mL, sigma) and  
146 lipopolysaccharide (LPS, 1  $\mu$ g/mL provided by China Animal Health and  
147 Epidemiology Center) were used as controls in this experiment.

#### 148 **Fusion protein preparation and verification**

149 Selected peptides were concatenated together and adjacent peptides were  
150 connected by a 'GGGS' linker(Fig S1). The DNA fragment corresponding to full  
151 length of concatenated peptides was synthesized and cloned into the expression vector  
152 pET-21a(+). Fusion protein containing concatenated peptides was expressed and  
153 purified from *E. coli* BL21(DE3) cells according to the optimized procedures (Sangon  
154 Biotech). The specific steps are described below.

155 After transferring the recombinant plasmid into BL21(DE3), 800  $\mu$ L of  
156 nonresistant LB medium was added, followed by incubation at 37°C for 45 min and  
157 centrifugation at 5000 rpm for 3 min. Most of the supernatant was discarded (leave  
158 approximately 100-150  $\mu$ L), the bacteria were resuspended, the LB plate with  
159 corresponding resistance was selected, and it was coated. After air-drying, it was  
160 inverted and cultured overnight in a 37°C incubator. The monoclonal colonies on the  
161 plate were chosen, placed into 10 mL of LB liquid medium and incubated at 37°C and  
162 200 rpm. The cultured bacterial solution was transferred to 750 mL of LB liquid

163 medium at 37°C and 200 rpm, cultured to OD<sub>600</sub>=0.6-0.8 with IPTG (0.5 mM) at  
164 16°C and induced overnight. Then, the cells were centrifuged at 6000 rpm for 5 min,  
165 the supernatant was discarded, and the bacteria were collected. Bacteria were blown  
166 away with 20-30 mL 10 mM Tris-HCl (pH = 8.0) solution and ultrasonically broken  
167 (500 W, 60 times, 10 s each time, 15 s interval). After sonication, 100 µL of the  
168 bacterial suspension was centrifuged at 12000 rpm for 10 min, and 50 µL of  
169 supernatant was transferred to another EP tube. After the supernatant was removed,  
170 the precipitate was blown away with 50 µL of 10 mM Tris-HCl (pH = 8.0) solution.  
171 SDS-PAGE and Western blotting were used to detect protein expression. A nickel  
172 column (Ni Sepharose 6 Fast Flow, GE Healthcare) for affinity chromatography was  
173 used for protein purification. \*Please rephrase the sentence  
174 \*Taking 5 mL of Ni-NTA, the equilibrium column was  
175 washed with 5 times the column bed volume of binding buffer at a flow rate of 5  
176 mL/min. The crude protein was incubated with the equilibrated column packing for 1  
177 h; the incubated product was loaded onto the column and the effluent liquid was  
178 collected; the equilibrium column was washed with binding buffer; the column was  
179 washed with washing buffer, and the effluent liquid was collected; with the column  
180 was eluted with elution buffer, and the effluent liquid was collected; and the crude  
181 protein was treated, washed with effluent and eluted with effluent separately, followed  
182 by sample preparation and, SDS-PAGE and WB detection. The concentrated protein  
183 was divided into 1 mL/tube and stored at -80°C.

### 183 **Evaluation of the diagnostic effect of fusion protein**

184 Diagnostic effect of the fusion protein was evaluated according to the iELISA

185 method described in **Evaluation of B cell epitopes section**. In this experiment, 1  $\mu\text{g}$   
186 fusion protein was coated to each well in 96-well plate, while other conditions were  
187 not changed.

#### 188 **Establishment of nano-p-ELISA**

189 ZnO nanorods were synthesized on Whatman No. 1 filter paper by a  
190 hydrothermal method[11]. Whatman filter paper was soaked in 100 mM zinc acetate  
191 solution for 60 s and then annealed at 100  $^{\circ}\text{C}$  for 1 h to form a seed layer. Then, the  
192 filter paper was transferred to a hydrothermal reaction vessel containing 100 mM  
193 hexamethylenetetramine and  $\text{Zn}(\text{NO}_3)_2 \cdot 6\text{H}_2\text{O}$ . Whatman filter paper was left at 90  $^{\circ}\text{C}$   
194 for 5 h for formation of ZnO nanorods. Filter paper was then immersed in anhydrous  
195 toluene solution with 1% APTES for 5 min, dried at 100  $^{\circ}\text{C}$  for 15 min and then  
196 silanized. Scanning electron microscopy (SEM, JSM-7500F), X-ray diffraction (XRD,  
197 Bruker D8) and X-ray photoelectron spectroscopy (XPS, Escalable250Xi) were used  
198 to evaluate the nanorods structure on the surface of the paper. Nano-ZnO modified  
199 Whatman filter paper was punched into circular pieces with a diameter of 10 mm and  
200 A4 plastic packaging paper was punched into small holes with a diameter of 6 mm.  
201 The 10 mm circle paper was placed in the center of the 6 mm holes of the plastic  
202 packaging paper, fixed by a plastic packaging machine, and cut into small strips for  
203 further use.

#### 204 **Evaluation of the diagnostic effect of nano-p-ELISA**

205 Five microliters of fusion protein solution (30  $\mu\text{g}/\text{mL}$  in PBS) was placed in each  
206 well, followed by incubation at room temperature for 30 min, washing with 20  $\mu\text{L}$  of



207 deionized water 3 times, and blocking with 20  $\mu$ L of 5% skimmed milk powder at  
208 room temperature for 15 min. After washing 3 times with PBST, 5  $\mu$ L of serum was  
209 added (diluted with 1:400) to the paper and incubated for 30 min. After washing 3  
210 times with PBST, 5  $\mu$ L of HRP labeled protein G was added (diluted with 1:8000),  
211 followed by incubation at room temperature for 210 s. After washing another 3 times,  
212 5  $\mu$ L of TMB substrate solution was added and incubated for 10 min. HP Laser Jet Pro  
213 MFP M227 was used to scan the paper. Image J software was used to carry out  
214 intensity analysis on developed color. To compare with the nano-p-ELISA method,  
215 the traditional p-ELISA (tra-p-ELISA) method was also performed according to  
216 literature[12]. Five microliters of chitosan dissolved in deionized water (0.25 mg/mL)  
217 was placed onto Whatman No.1 filter paper and air dried at room temperature. Then,  
218 5  $\mu$ L of 2.5% glutaraldehyde solution was added to the paper and incubated at room  
219 temperature for 2 h. The remaining steps are same as described in nano-p-ELISA.

## 220 **Statistical analysis**

221 Dot plot and receiver operating characteristic (ROC) curve analyses were  
222 performed using GraphPad Prism version 6.05. The gray intensity were determined by  
223 Student's t-test (unpaired t-test). *P*-values<0.05 were considered to be significantly  
224 different.

## 225 **Results**

### 226 **B cell epitope prediction and evaluation**

227 From five *Brucella* antigen proteins, BP26, Omp16, Omp25, Omp31 and Omp2b  
228 predicted 14, 8, 14, 12, 19 epitopes respectively, and finally a total of 22 epitopes

229 were selected (Table 1). The length of these peptides ranged from 9 to 28 amino acid.

230 The 22 polypeptide epitopes were synthesized and coupled to KLH. The results of

231 iELISA showed that these epitopes have different ability in identifying human

232 brucellosis positive sera (Fig 1). Average OD<sub>450</sub> value of KLH plus 3 times Standard

233 Deviation (SD) was used as threshold to distinguish positive and negative samples,

234 here the threshold value being calculated as 0.5178, the epitope with the highest

235 capability was P19266-6, as from 121 human brucellosis serum samples, 79 samples

236 were detected as above the threshold. The other six epitopes (P19266-5, 12, 13, 15, 16

237 and 18) displayed medium capability with 37, 43, 44, 33, 24 and 33 samples were

238 identified respectively. The remaining epitopes showed only limited capability, with

239 no more than 20 positive samples being **detected** (table 1).

240 Table 1 Information about 22 predicted B cell epitopes

| Protein | Epitope (amino acid sequence)    | Start-end position | Length | Peptide ID | Number of positive sera recognized (n=121) |
|---------|----------------------------------|--------------------|--------|------------|--------------------------------------------|
| BP26    | AFAQENQMTTQPARIAV                | 26-42              | 17     | P19266-1   | 18                                         |
|         | KAGIEDRDLQTGGIN                  | 88-102             | 15     | P19266-2   | 17                                         |
|         | QPIYVYPDDKNNLKEPTITGY            | 104-124            | 21     | P19266-3   | 17                                         |
|         | GVNQGGDLNLVNDNPSAVIN             | 151-170            | 20     | P19266-4   | 19                                         |
|         | LSRPPMPMP                        | 204-212            | 9      | P19266-5   | 37                                         |
|         | AAAPDNSVPIAAGENSYNVSV<br>NVVFE   | 223-248            | 26     | P19266-6   | 79                                         |
| Omp2b   | SGAQAADAIVAPEPEAVEY              | 31-49              | 19     | P19266-7   | 10                                         |
|         | DVKGGDDVYSGTDRNGWDK              | 79-97              | 19     | P19266-8   | 12                                         |
|         | NNSGVDGKYGNETSSGTV               | 129-146            | 18     | P19266-9   | 10                                         |
|         | TVTPEVSYTKFGGEWKNTVAE<br>DNAWGGI | 341-368            | 28     | P19266-10  | 11                                         |
| Omp16   | AAAPGSSQDFTV                     | 44-55              | 12     | P19266-11  | 1                                          |
|         | SRGVPTNRMRTISYGNERPVA<br>VCD     | 125-148            | 24     | P19266-12  | 42                                         |
| Omp25   | GRAKLENRTNGGTS                   | 56-69              | 14     | P19266-13  | 44                                         |

|       |                         |         |    |           |    |
|-------|-------------------------|---------|----|-----------|----|
|       | GNPVQTTGETQ             | 115-125 | 11 | P19266-14 | 1  |
|       | GGIKNSLRIGGEESKSKTQT    | 154-174 | 21 | P19266-15 | 33 |
|       | GWTVGAGIEYAA            | 175-186 | 12 | P19266-16 | 24 |
|       | TDYGKKNFGLNDLDTRGSFKT   | 199-223 | 25 | P19266-17 | 6  |
|       | NDIR                    |         |    |           |    |
|       | VSEPSAPTAAPVDTF SWTGGYI | 24-49   | 26 | P19266-18 | 33 |
|       | GINA                    |         |    |           |    |
|       | GKFKHPFSSFDKEDNEQVSGSL  | 53-75   | 23 | P19266-19 | 8  |
| Omp31 | TGSISAGASGLEKAE         | 112-127 | 16 | P19266-20 | 7  |
|       | GDDASALHTWSDKTKAGWTL    | 168-194 | 27 | P19266-21 | 4  |
|       | GAGAEYA                 |         |    |           |    |
|       | DLGKRNLVD               | 209-217 | 9  | P19266-22 | 8  |

241

242 **Fig 1.** Dotplot result of 22 epitopes in identifying 121 human brucellosis positive

243 serum by iELISA

#### 244 **Fusion protein preparation and its diagnostic effect**

245 As each of 22 predicted epitopes demonstrated some extent discerning capability  
 246 for brucellosis sera, all these epitopes were included for constructing a fusion protein.  
 247 SDS-PAGE showed that the molecular weight of prokaryotically expressed fusion  
 248 protein was approximately 66 kDa (Figs 2A and 2B). Western blotting using anti-his  
 249 tag antibody showed the same result (Fig 2C). Further mass spectrometry verified that  
 250 the fusion protein was correctly expressed.

251 The diagnostic effect of the purified fusion protein was verified using 121 human  
 252 brucellosis sera and 90 control sera. For the fusion protein, the area under the ROC  
 253 curve was 0.9877 (95% CI: 0.9758 to 0.9996), while the area under the ROC curve  
 254 for LPS was 0.9174 (95% CI: 0.8796 to 0.9552) (Fig 3), indicating that fusion protein  
 255 has higher diagnostic effectiveness than LPS. The optimal cutoff value was also  
 256 calculated by the Youden index, under which the positive predictive value (PPV) and

257 negative predictive value (NPV) of fusion protein were higher than those of  
 258 LPS(Table 2). Under the cutoff value, 3 negative samples were misdiagnosed as  
 259 positive with fusion protein. However, 20 negative samples was misdiagnosed as  
 260 positive with LPS. This data indicated that the fusion protein had better specificity  
 261 than LPS.

262 Table 2. Positive and negative predictive values of the test calculated for different  
 263 cutoff values

| Cutoff value            | Positive |    | Negative |    | PPV (%) | NPV (%) |
|-------------------------|----------|----|----------|----|---------|---------|
|                         | TP       | FN | TN       | FP |         |         |
| ≥0.470 (fusion protein) | 117      | 4  | 87       | 3  | 95.90   | 95.51   |
| ≥0.4095 (LPS)           | 115      | 6  | 70       | 20 | 85.19   | 92.10   |
| ≥50.98 (nano-p-ELISA)   | 113      | 8  | 88       | 2  | 98.26   | 91.67   |
| ≥45.66 (tra-p-ELISA)    | 113      | 8  | 87       | 3  | 97.41   | 91.58   |

264 TP, true positives; TN, true negatives; FP, false positives; FN, false negatives; PPV,  
 265 positive predictive value  $(TP/TP+FP) \times 100$ ; NPV, negative predictive value  
 266  $(TN/TN+FN) \times 100$ .

267

268 **Fig 2.** SDS-PAGE and Western blot analysis of fusion protein. (A)SDS-PAGE result  
 269 of fusion protein in the process of purification (M, marker; lane1, loading solution;  
 270 lane2, flow-through solution; lane3-4, 20 mM imidazole elution fraction; lane5, 50  
 271 mM imidazole elution fraction; lane6, 500 mM imidazole elution fraction). (B)  
 272 SDS-PAGE result of purified fusion protein (M, marker; lane1, purified protein). (C)

273 Western blot result of purified fusion protein (M, marker; lane1, purified protein).

274

275 **Fig 3.** Comparison of fusion protein and LPS in detecting human brucellosis positive  
276 and negative sera. (A) Dotplot result of iELISA assay with fusion protein. (B) ROC  
277 analysis of iELISA assay with fusion protein.(C) Dotplot result of iELISA assay with  
278 LPS antigen. (D) ROC analysis of iELISA assay with LPS antigen.

### 279 **Characterization of nano-ZnO**

280 XRD results showed that the main composition of nano-ZnO was successfully  
281 formed(Fig 4A). Scanning electron microscopy showed the shape of nano-ZnO on the  
282 surface of Whatman filter paper (Fig 4B). XPS showed that the concentration of Zn  
283 atoms was 40.79% and the concentration of oxygen atoms was 59.21%, which further  
284 indicated that the nano-crystal was composed of ZnO.

285

286 **Fig 4.** Characterization of prepared nano-ZnO. (A) XRD analysis of nano-ZnO. (B)  
287 The shape of nano-ZnO acquired by scanning electron microscope.

### 288 **Evaluation of the diagnostic effect of nano-p-ELISA**

289 Using 211 human brucellosis positive and negative sera, the ROC curve was  
290 obtained for nano-p-ELISA. Under the optimal cutoff value, 113 out of 121 positive  
291 samples were accurately diagnosed, and 88 out of the 90 negative samples were  
292 correctly identified. The positive predictive value of the nano-p-ELISA was 98.26%,  
293 and the negative predictive value was 91.67% (Table 2). There was a significant  
294 difference between the positive and negative samples( $P<0.001$ ) (Fig 5A). The area

295 under the curve was 0.9900 (95% CI, 0.9816 to 0.9984), indicating that this method  
296 performed well in diagnosing human brucellosis. The optimal cutoff value was 50.98,  
297 under which the sensitivity of this method was 92.38% (95% CI, 0.8554 to 0.9665)  
298 and the specificity was 98.35% (95% CI, 0.9416 to 0.9980)(Fig 5B).

299 Correspondingly, the gray intensities and ROC curve of tra-p-ELISA  
300 demonstrated a similar performance as nano-p-ELISA(Figs 5C and 5D). Sensitivity  
301 and specificity analysis also supported this conclusion(Table 2).

302

303 **Fig 5.** P-ELISA analysis of human serum samples. (A)Dotplotresult of the  
304 nano-p-ELISA assay. (B) ROC analysis of nano-p-ELISA assay results. (C) Dotplot  
305 result of tra-p-ELISA assay. (D) ROC analysis of tra-p-ELISA assay results.

## 306 **Discussion**

307 At present, the most of commercially available brucellosis detecting kits are  
308 based on the LPS which is polysaccharides compound on the surface of *Brucella*.  
309 Although single antigenic epitope of LPS can be chemically synthesized[13], under  
310 most circumstances, acquisition of LPS is only achieved by culturing live *Brucella* in  
311 high-level biosafety laboratories, which is an insurmountable obstacle for most  
312 diagnostics manufacturers. Therefore, seeking for new candidate antigen to replace  
313 LPS is of great significance for developing brucellosis detecting kits which can be  
314 easily produced and available to all users.

315 According to literatures, many *Brucella* OMPs manifested strong capacity in  
316 arousing humoral immune response [14-16], and some of these proteins have also

317 been used for development of subunit vaccine against brucellosis[17,18]. In our  
318 previous study, some *Brucella* OMPs showed quite satisfactory result in diagnosing  
319 brucellosis, basically comparable to LPS antigen [7]. The data in this paper reflected  
320 that not only entire OMPs, the linear short peptides in these OMPs also maintain good  
321 antigenicity. Moreover, multiple epitopes were more effective than single epitopes in  
322 identifying human brucellosis positive sera. It seems that higher sensitivity of  
323 epitope-based protein antigen could be achieved by increasing the number of epitopes.  
324 But, more epitopes could imply lower specificity as the chance of including common  
325 epitopes with other pathogens can be simultaneously increased. Therefore, there is  
326 still a lot of trimming work to be done on this fusion protein, so that the most suitable  
327 epitopes are selected for future commercial use.

328       The immunoinformatic analysis is an emerging science that integrates life  
329 sciences, computer science and mathematics to accelerate the process for vaccine  
330 design, disease diagnosis and treatment, as well as diagnostic agent screening[19,20].  
331 The online immunoinformatic tool (Bepipred Linear Epitope Prediction) used in this  
332 study were proved to be feasible in discerning viable B cell epitopes, as a quite  
333 number of predicted epitopes were subsequently confirmed to be effective in  
334 laboratory. On the other hand, there were still many predicted epitopes just showing  
335 limited diagnostic effects. Hopefully in the future, a combination of  
336 immunoinformatic tools can be set up and used to improve the efficiency of epitope  
337 prediction.

338 Fast and easy-to-perform are the most concerned features in developing novel  
339 brucellosis detection technologies, especially in the point-of-care testing of medical  
340 diagnosis, environmental surveillance and food safety analysis. P-ELISA has attracted  
341 the attention from many researchers due to its higher specificity, simplicity, rapidity,  
342 portability and low cost [22,23]. Currently, nanomaterial modified p-ELISA are more  
343 widely used as modification can increase the surface area of the paper[10, 24-26].  
344 Although tra-p-ELISA and nano-p-ELISA demonstrated similar antigenic capability,  
345 the latter method is more suitable for rapid on-site detection as it uses fewer reagent  
346 and can be stored at room temperature for a long time.

347 In summary, using bioinformatic technology combined with nanomaterials, this  
348 performance has established a new type of brucellosis diagnostic technology, which  
349 has good potential application value. However, the brucellosis sera selected in this  
350 study were all clinically screened positive sera, and the number was limited. The  
351 diagnostic validity of this method requires a large number of clinical random samples  
352 for verification. Beside nano-p-ELISA, there are some other methods suitable for  
353 rapid on-site testing, such as FPA and ICA. Combining the multiepitope based antigen  
354 and well established fast testing methods, more brucellosis testing kits would be  
355 produced in the future to meet the varied demand for brucellosis testing.

356

## 357 **Acknowledgments**



358 We thank the School of Public Health of Jilin University for their gift of the  
359 brucellosis serum samples.

### 360 **Competing interests**

361 The authors declare that they have no competing interests

### 362 **Funding**

363 This work was supported by Young Scientists Fund of the National Natural Science  
364 Foundation of China (Grant number 81802101).

### 365 **Author Contributions**

366 **Conceptualization:** Dehui Yin, Mingjun Sun, Hai Jiang, Jingpeng Zhang.

367 **Data Curation:** Dehui Yin, Qiongqiong Bai, Xiling Wu, Han Li.

368 **Formal Analysis:** Dehui Yin, Qiongqiong Bai, Jihong Shao.

369 **Funding Acquisition:** Dehui Yin.

370 **Investigation:** Dehui Yin, Mingjun Sun.

371 **Methodology:** Dehui Yin, Qiongqiong Bai, Xiling Wu, Han Li, Jihong Shao, Mingjun  
372 Sun.

373 **Project Administration:** Dehui Yin, Mingjun Sun, Jingpeng Zhang.

374 **Resources:** Dehui Yin, Mingjun Sun, Han Li, Jingpeng Zhang.

375 **Supervision:** Dehui Yin, Mingjun Sun, Jingpeng Zhang.

376 **Validation:** Dehui Yin, Mingjun Sun.

377 **Writing – Original Draft Preparation:** Dehui Yin, Qiongqiong Bai.

378 **Writing – Original Draft Preparation:** Dehui Yin, Mingjun Sun, Hai Jiang,  
379 Jingpeng Zhang.

380

## 381 **References**

382 1. Olsen SC, Palmer MV. Advancement of knowledge of Brucella over the past 50  
383 years. *Vet Pathol.* **2014**; 51:1076-89.

384 2. Pappas G, Papadimitriou P, Akritidis N, Christou L, Tsianos EV. The new global  
385 map of human brucellosis. *Lancet Infect Dis.* **2006**;6:91-9.

386 3. Dean AS, Crump L, Greter H, Schelling E, Zinsstag J. Global burden of human  
387 brucellosis: a systematic review of disease frequency. *PLoS Negl Trop*  
388 *Dis.* **2012**;6:e1865.

389 4. Araj GF. Update on laboratory diagnosis of human brucellosis. *Int J Antimicrob*  
390 *Agents.* **2010**;36Suppl1:12-7.

391 5. Zeybek H, Acikgoz ZC, Dal T, Durmaz R. Optimization and validation of a  
392 real-time polymerase chain reaction protocol for the diagnosis of human brucellosis.  
393 *Folia Microbiol (Praha).* **2020**;65:353-61.

394 6. Yagupsky P, Morata P, Colmenero JD. Laboratory Diagnosis of Human Brucellosis.  
395 *ClinMicrobiol Rev.* **2019**;33:e00073-19.

396 7. Bai Q, Li H, Wu X, Shao J, Sun M, Yin D. Comparative analysis of the main  
397 outer membrane proteins of Brucella in the diagnosis of brucellosis. *Biochem*  
398 *Biophys Res Commun.* **2021**;560:126-31.

399 8. Zhao Y, Zeng D, Yan C, Chen W, Ren J, Jiang Y, et al. Rapid and accurate detection  
400 of Escherichia coli O157:H7 in beef using microfluidic wax-printed paper-based  
401 ELISA. *Analyst*.**2020**;145:3106-15.

402 9. Kasetsirikul S, Umer M, Soda N, Sreejith KR, Shiddiky MJA, Nguyen NT.  
403 Detection of the SARS-CoV-2 humanized antibody with paper-based ELISA.  
404 *Analyst*.**2020**;145:7680-86.

405 10. Cheng CM, Martinez AW, Gong J, Mace CR, Phillips ST, Carrilho E, et al.  
406 Paper-based ELISA. *AngewChemInt Ed Engl*.**2010**;49:4771-4.

407 11. Tiwari S, Vinchurkar M, Rao VR, Garnier G. Zinc oxide nanorods functionalized  
408 paper for protein preconcentration in biodiagnostics. *Sci Rep*.**2017**;7:43905.

409 12. Wang S, Ge L, Song X, Yu J, Ge S, Huang J, et al. Paper-based  
410 chemiluminescence ELISA: lab-on-paper based on chitosan modified paper device  
411 and wax-screen-printing. *BiosensBioelectron*.**2012**;31:212-8.

412 13. McGiven J, Howells L, Duncombe L, Stack J, Ganesh NV, Guiard J, et al.  
413 Improved serodiagnosis of bovine brucellosis by novel synthetic oligosaccharide  
414 antigens representing the capping m epitope elements of Brucella O-polysaccharide. *J*  
415 *Clin Microbiol*. **2015**;53:1204-10.

416 14. Hou H, Liu X, Peng Q. The advances in brucellosis vaccines. *Vaccine*.**2019**;  
417 37:3981-8.

418 15. Verdiguél-Fernández L, Oropeza-Navarro R, Ortiz A, Robles-Pesina MG,  
419 Ramírez-Lezama J, Castañeda-Ramírez A, et al. Brucella melitensis omp31 Mutant Is  
420 Attenuated and Confers Protection Against Virulent Brucella melitensis Challenge in

421 BALB/c Mice. *J MicrobiolBiotechnol.***2020**;30:497-504.

422 16. Gupta S, Singh D, Gupta M, Bhatnagar R. A combined subunit vaccine  
423 comprising BP26, Omp25 and L7/L12 against brucellosis. *Pathog Dis.***2019**;  
424 77:ftaa002.

425 17. Rezaei M, Rabbani-Khorasgani M, Zarkesh-Esfahani SH, Emamzadeh R, Abtahi  
426 H. Prediction of the Omp16 Epitopes for the Development of an Epitope-based  
427 Vaccine Against Brucellosis. *Infect Disord Drug Targets.***2019**;19:36-45.

428 18. Degos C, Hysenaj L, Gonzalez-Espinoza G, Arce-Gorvel V, Gagnaire A,  
429 Papadopoulos A, et al. Omp25-dependent engagement of SLAMF1 by *Brucella*  
430 abortus in dendritic cells limits acute inflammation and favours bacterial persistence  
431 in vivo. *Cell Microbiol.***2020**;22:e13164.

432 19. D'Annessa I, Di Leva FS, La Teana A, Novellino E, Limongelli V, Di Marino D.  
433 Bioinformatics and Biosimulations as Toolbox for Peptides and Peptidomimetics  
434 Design: Where Are We? *Front MolBiosci.***2020**;7:66.

435 20. Agyei D, Tsoptom A, Udenigwe CC. Bioinformatics and peptidomics approaches  
436 to the discovery and analysis of food-derived bioactive peptides. *Anal Bioanal*  
437 *Chem.***2018**;410:3463-72.

438 21. Backert L, Kohlbacher O. Immunoinformatics and epitope prediction in the age of  
439 genomic medicine. *Genome Med.***2015**;7:119.

440 22. Fu H, Song P, Wu Q, Zhao C, Pan P, Li X, et al. A paper-based microfluidic  
441 platform with shape-memory-polymer-actuated fluid valves for automated multi-step  
442 immunoassays. *MicrosystNanoeng.***2019**;5:50.

443 23. Pang B, Zhao C, Li L, Song X, Xu K, Wang J, et al. Development of a low-cost  
444 paper-based ELISA method for rapid Escherichia coli O157:H7 detection. Anal  
445 Biochem.**2018**;542:58-62.

446 24. Cui H, Song W, Cao Z, Lu J. Simultaneous and sensitive detection of dual DNA  
447 targets via quantum dot-assembled amplification labels. Luminescence.**2016**;  
448 31:281-7.

449 25. Tian Y, Zhang L, Wang L. DNA-Functionalized Plasmonic Nanomaterials for  
450 Optical Biosensing. Biotechnol J.**2020**;15:e1800741.

451 26. Marie M, Manoharan A, Kuchuk A, Ang S, Manasreh MO. Vertically grown zinc  
452 oxide nanorods functionalized with ferric oxide for in vivo and non-enzymatic  
453 glucose detection. Nanotechnology.**2018**;29:115501.

454

#### 455 **Supporting information**

456 **S1 Fig. Fig S1.** Comprehensive sequence of amino acids of the fusion protein; the  
457 linkers are in red font.

458 **S2 Fig. Fig S2.** Results of p-ELISA. (A) Positive of nano-p-ELISA. (B) Negative of  
459 nano-p-ELISA. (C) Positive of tra-p-ELISA. (D) Negative of tra-p-ELISA.

460 **S1 Table. Table S1.** Information of the patient

461 **S2 Table. Table S2.** The OMPs' Accession Numbers of *Brucella* in NCBI Protein  
462 database

463 **S1 Data. supporting data for figure 1.**

464 **S2 Data. supporting data for figure 3.**

465 **S3 Data. supporting data for figure 5.**

466 **S4 Data. supporting data for XPS**

467 **S5 Data. supporting data for figure 4A.**

468 **S1 File. Medical Ethics Review Report.**

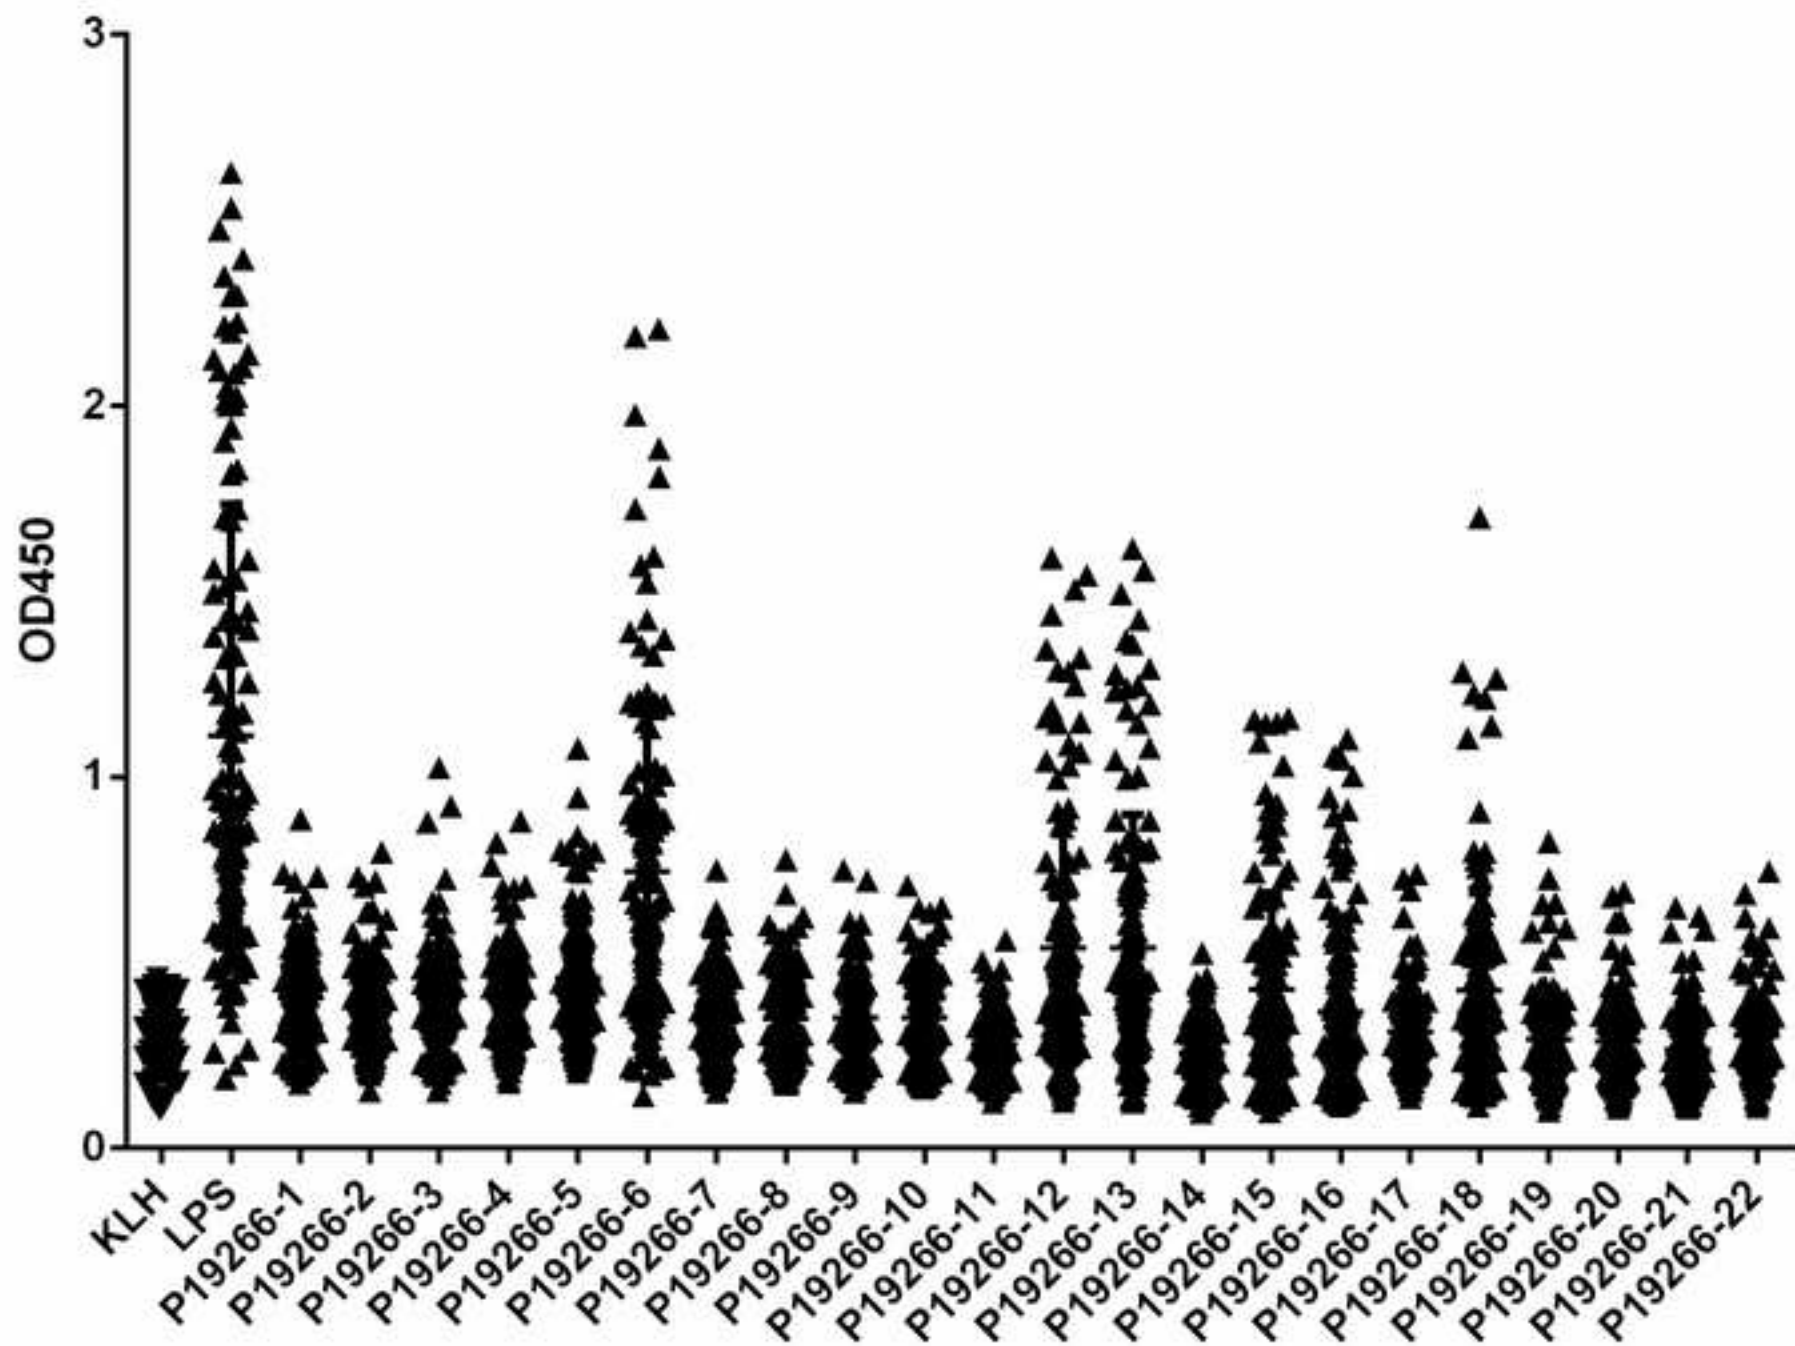

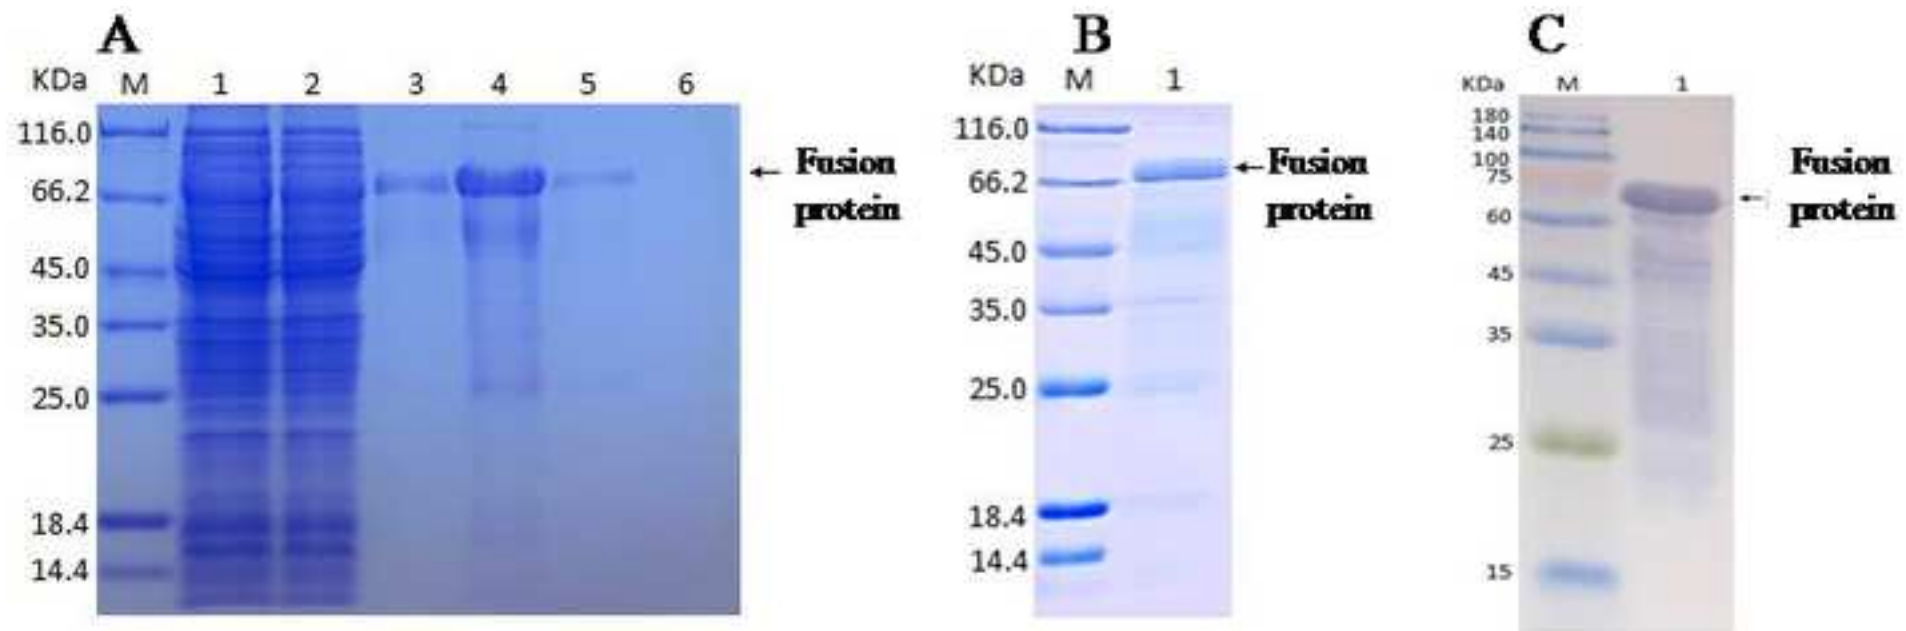

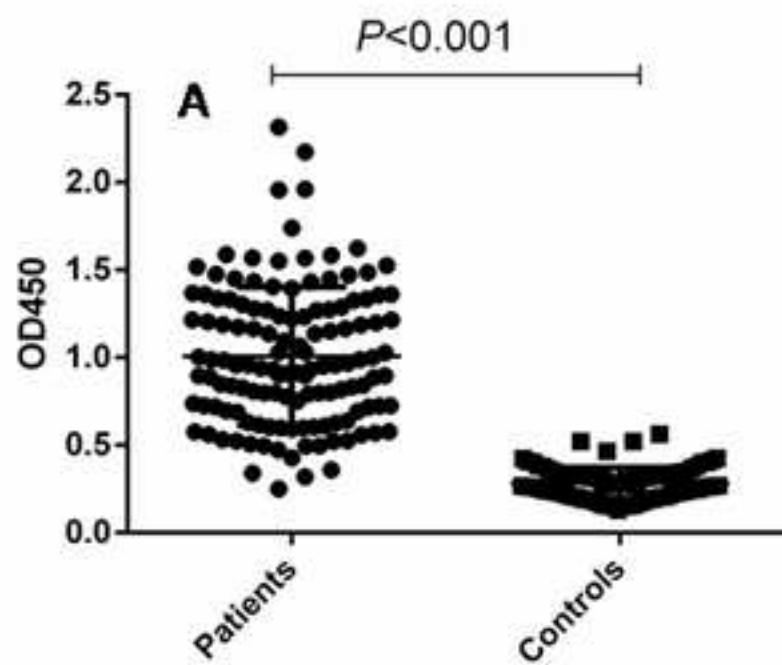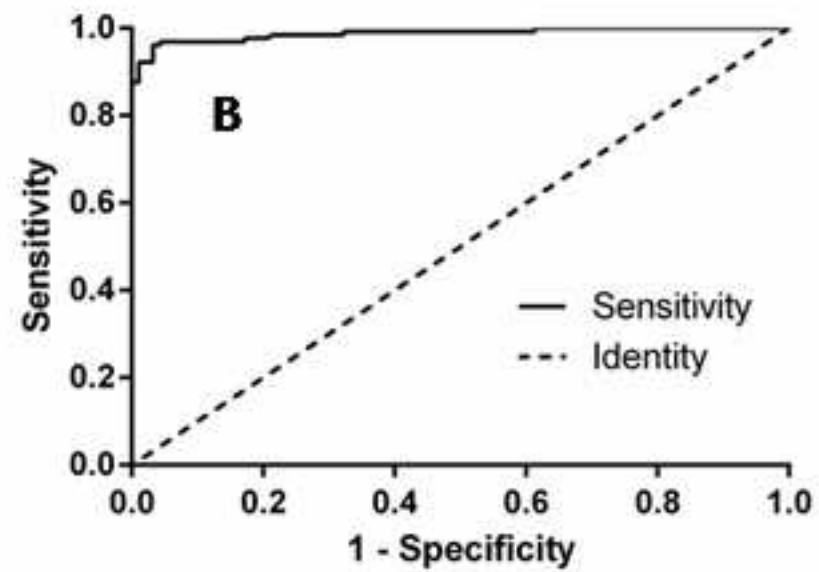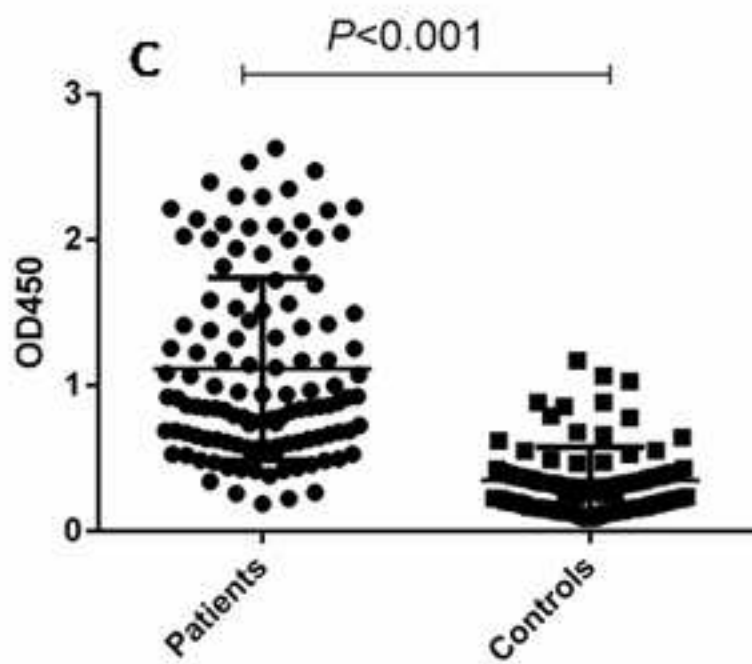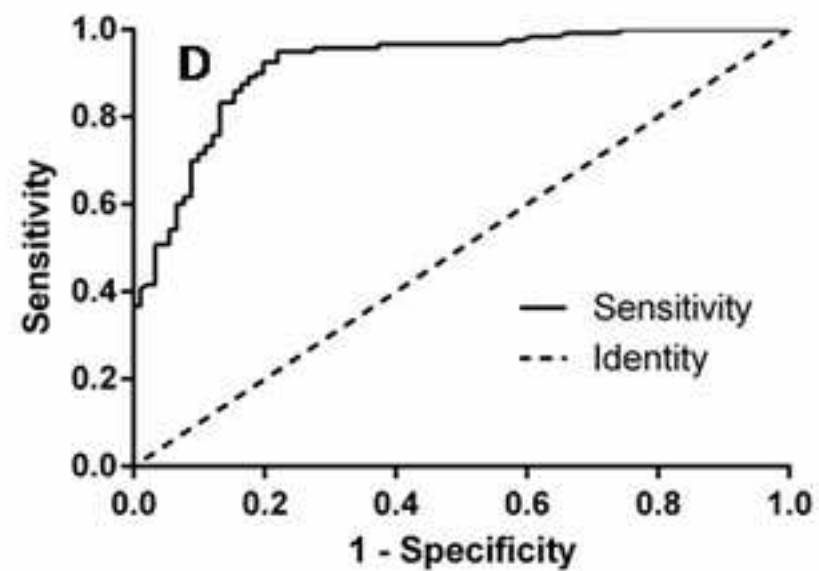



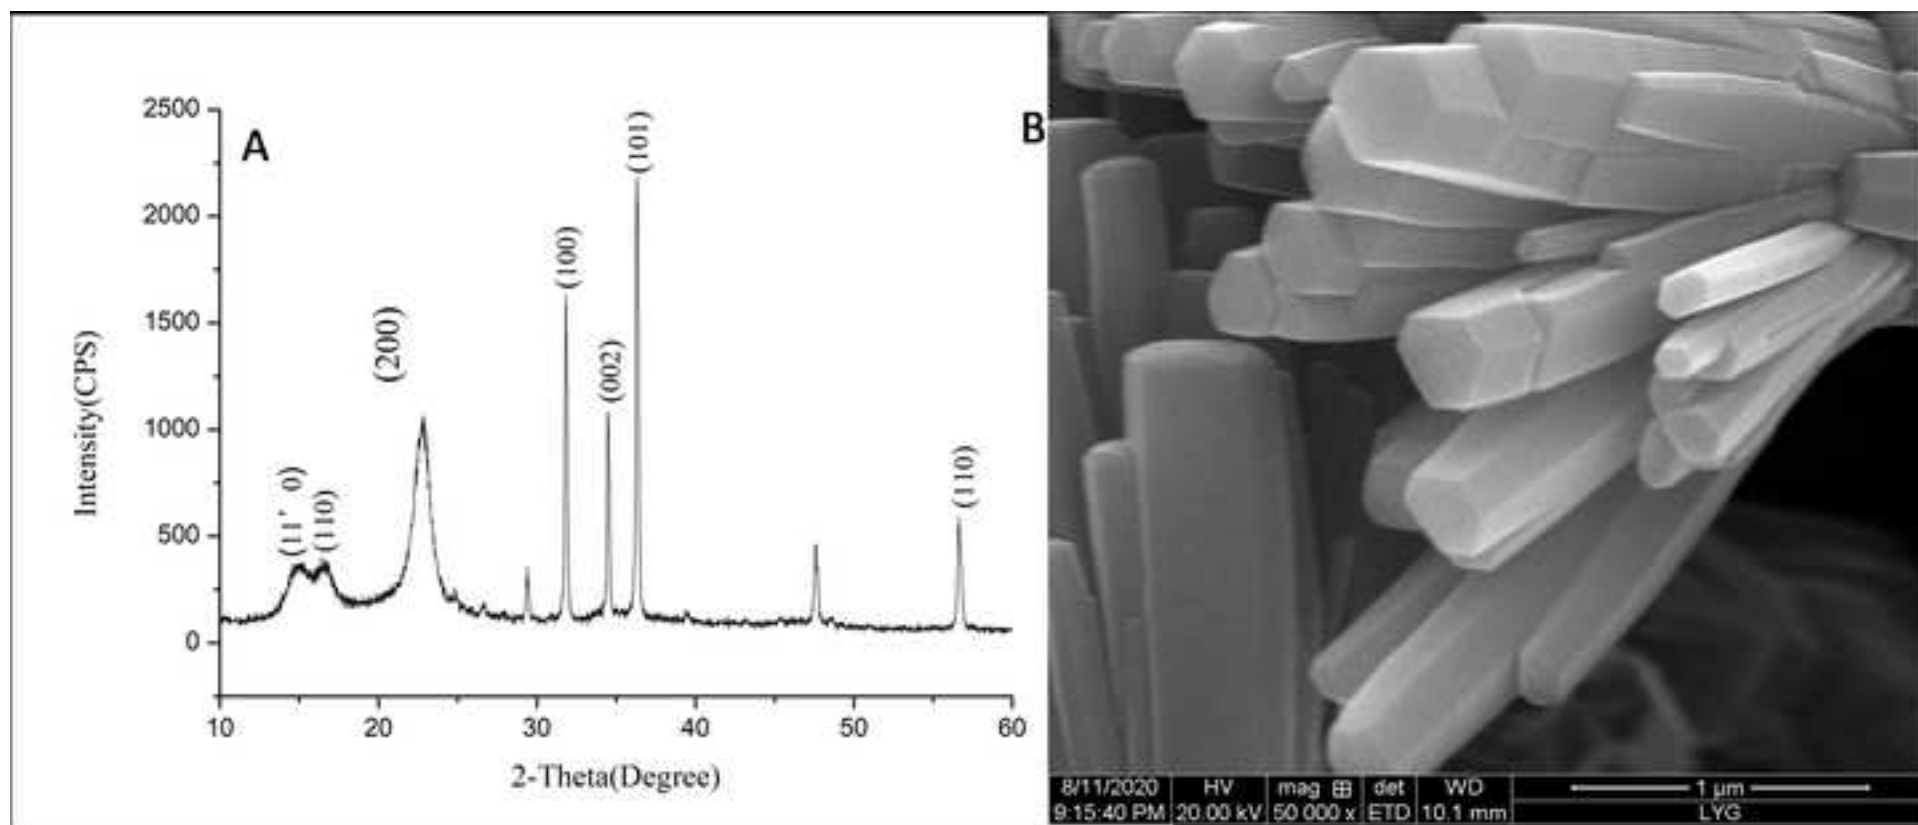

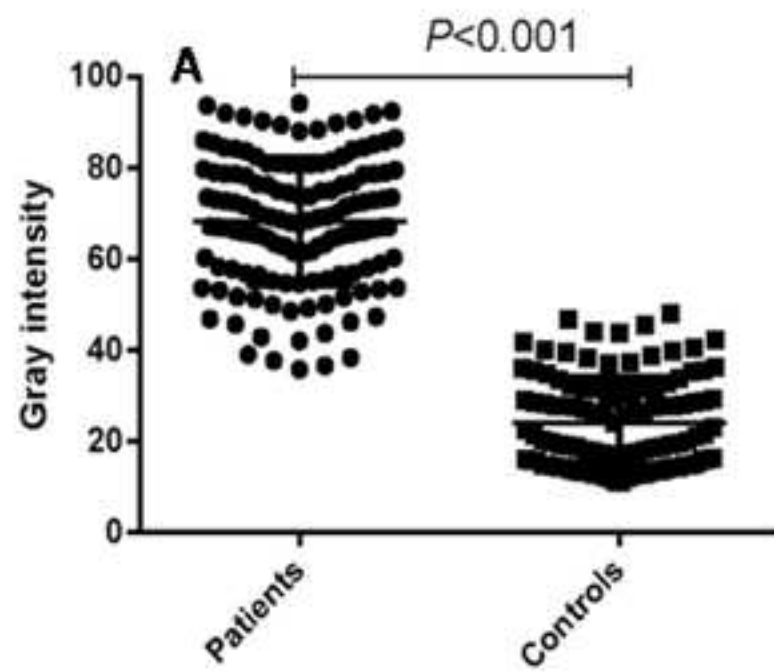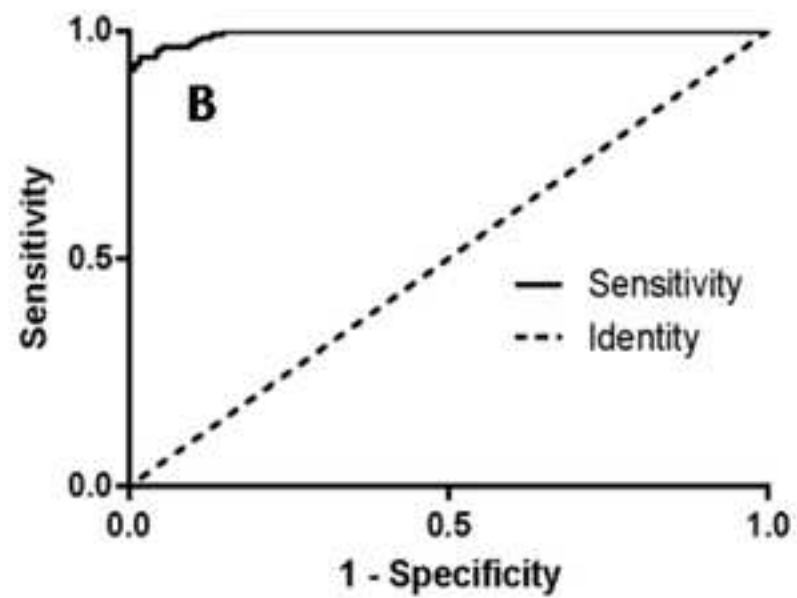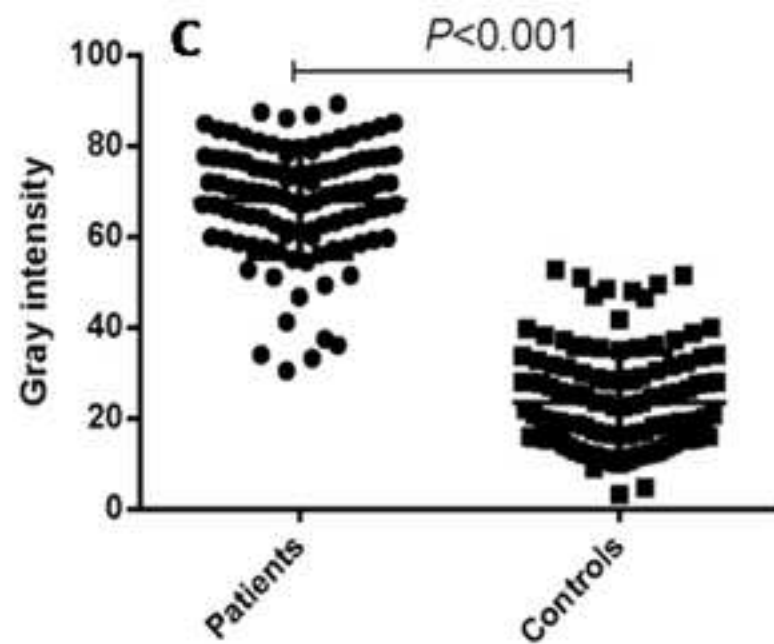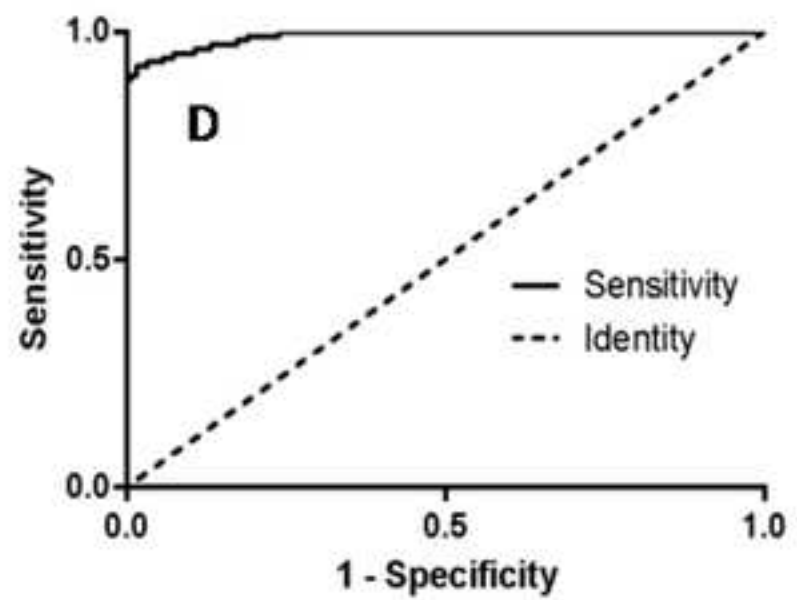

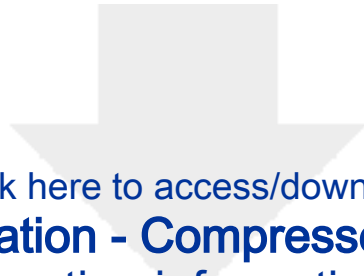

[Click here to access/download](#)

**Supporting Information - Compressed/ZIP File Archive**  
Supporting information.zip

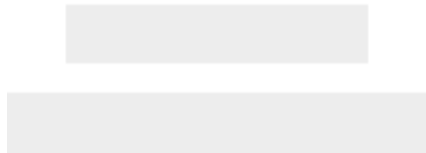

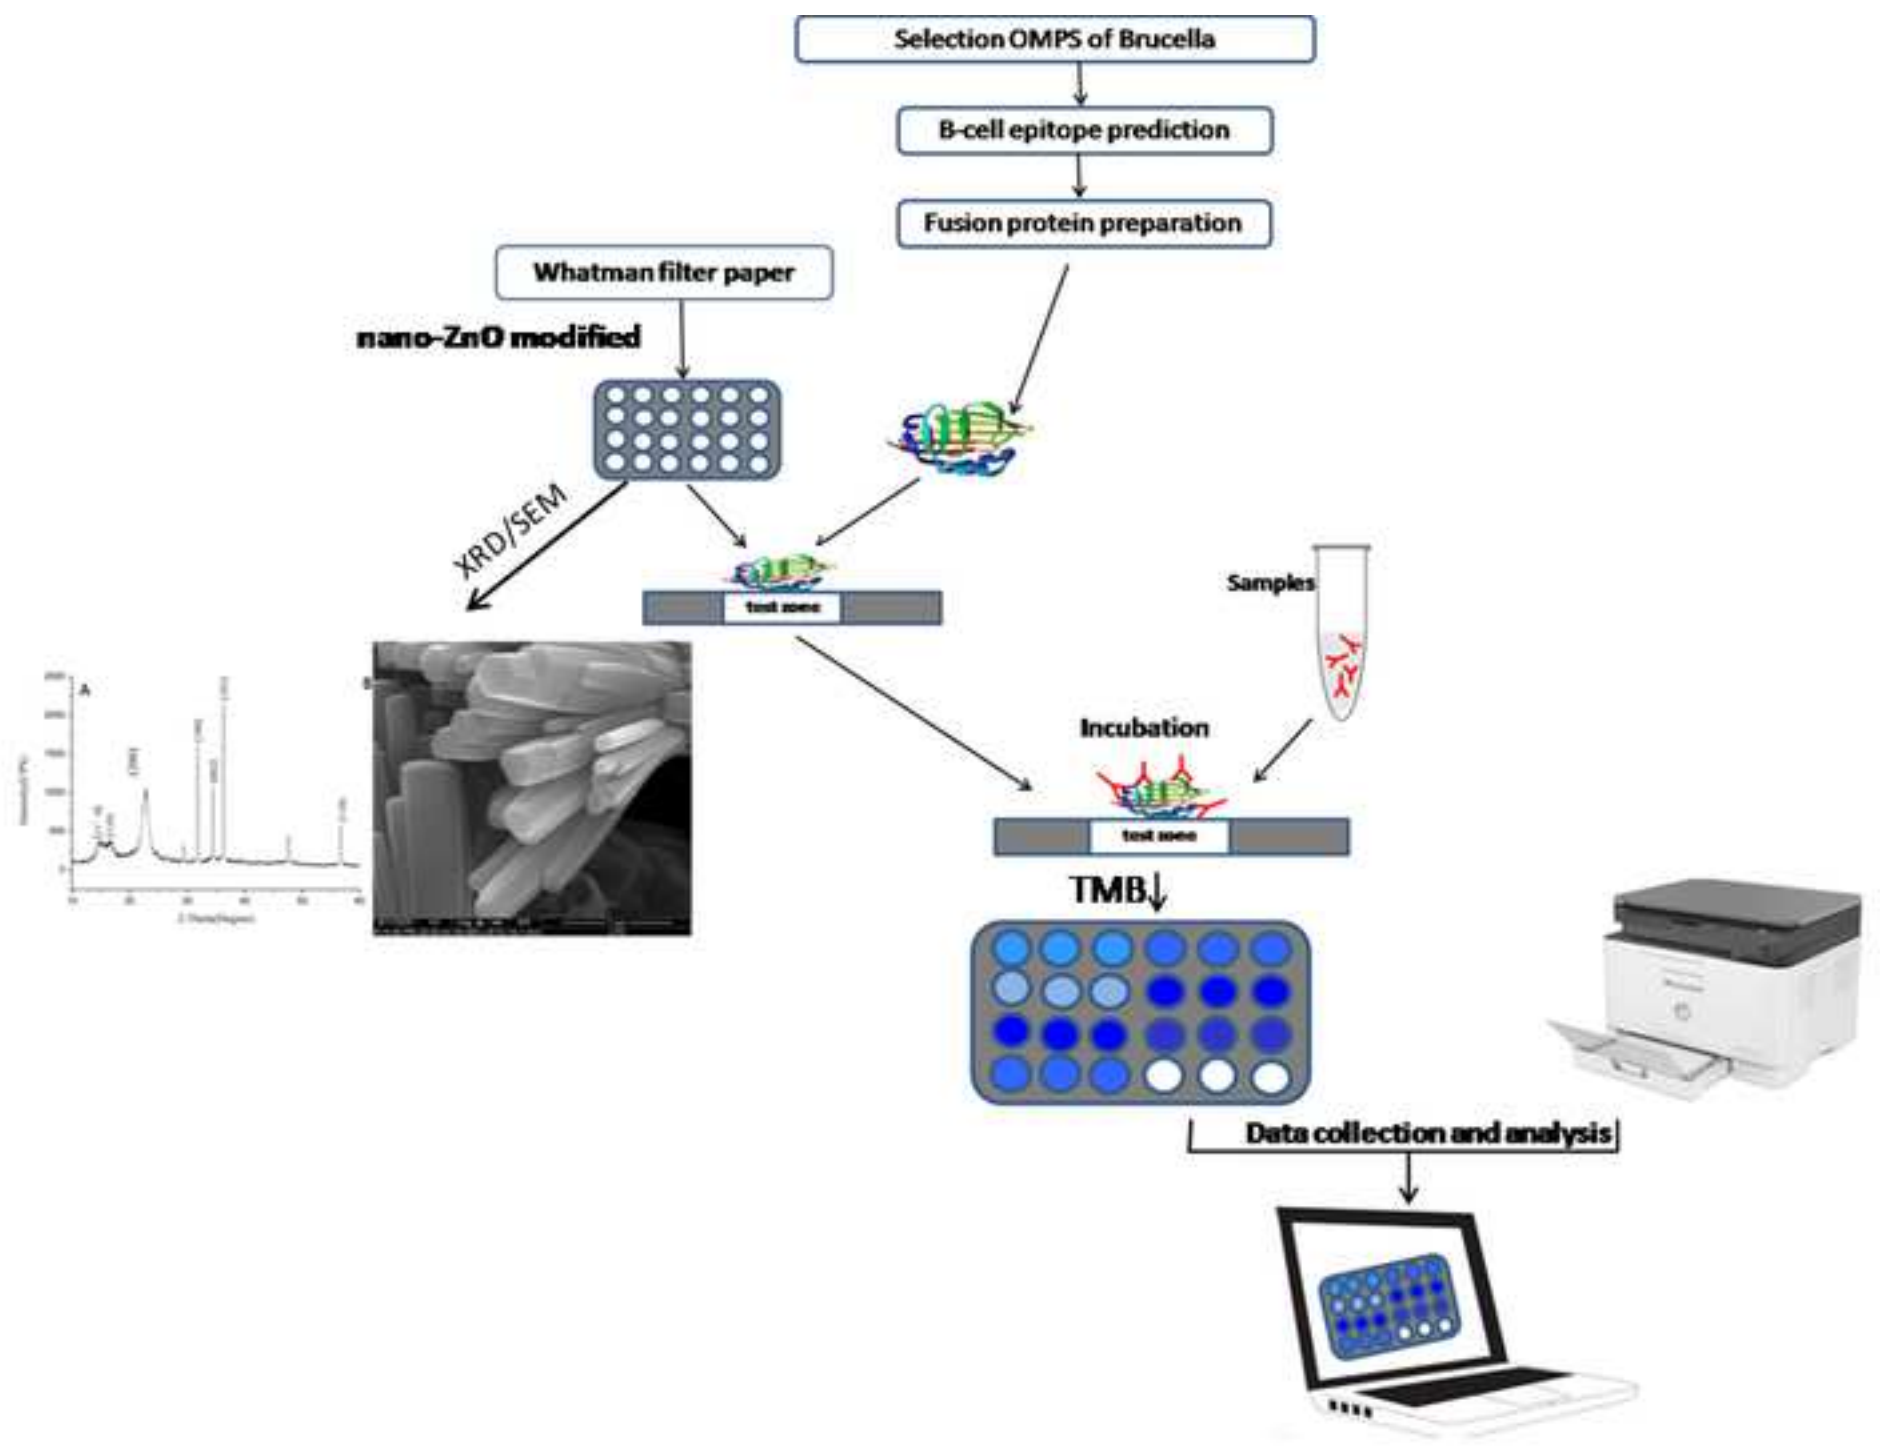

**Dear Editors and Reviewers:**

We really appreciate for your time and comments on our manuscript entitled "Paper-based ELISA diagnosis technology for human brucellosis based on a multiepitope fusion protein" (ID: PNTD-D-21-00330). Considering the reviewers' comments and the fact that English is not our native language, to make it more understandable, we consulted to native English speaker and made extensive revision on the main text, but the results and supporting materials such as tables and pictures were not changed. We hope that the massive text changes would not result in adverse effect that the revised manuscript could be considered as a new manuscript. The previous and revised manuscripts were provided for your consideration.

More attentions were paid to the sections reviewers most concerned, and modification has been made according to the reviewer's suggestion. To the reviewer's comments, our responses were listed as followings:

**Methods**

**Reviewer #1:**

**1. Objectives and hypothesis are not clear in the manuscript. Methods need details and not matching with the results provided.**

**Response:** The objective of this study is to provide a novel diagnostic antigen for brucellosis. To make the objective clearer, we reorganized the Introduction section, and added description about antigen used in current brucellosis testing methods. We hypothesized that the B cell epitopes predicted from *Brucella* out membrane proteins can be used to replace LPS for brucellosis serodiagnosis. So, in this study, a fusion protein containing multiepitopes were produced ant its efficacy in diagnosing human

brucellosis was evaluated with ELISA method. At the same time, the Method and Results sections were carefully revised and more details were added. We believed that the results were much clearer in revised manuscript.

**2. Section starting from L106 and 111 could be pooled together to make it comprehensive and easy to follow. The algorithm used to determine length and selection of sequence of peptides predicted and selected for the study are not mentioned. Also, the number of peptide epitopes predicted are missing. Were only 22 peptides predicted and used in screening by ELISA and for fusion protein preparation? Or 22 peptides were selected? The final length and details of sequence for fusion protein produced are missing in methods, as provided in table 1.**

**Response:** Line 106 to line 111 has been revised in the new manuscript. The method used to determine length and selection of sequence of peptides were added to the **Methods** Section. The prediction was mainly depended on the online software BepiPred (<http://tools.iedb.org/bcell/>) using default parameters. The output epitopes had different number of amino acid and some even contains just single amino acid. So an empirical value was used to choose the epitopes, here epitopes containing more than 6 amino acids were believed to have effective diagnostic capability. From five Omps, a total of 22 predicted peptides were found to be longer than 6 amino acids, and all of them were included in following verifying assay by ELISA. The method section has been modified so that the epitope prediction and selection step can be clearly described (Line 125). The final length and details of sequence for fusion

protein were also added, please see the **Supporting information (Fig S1)**.

**3. L236-Describe the positive sera used for screening of peptides? Is it the reference sera or from 121 known positive sera? Were all sera reacted to all 22 peptides?**

Response: We are very sorry that we did not describe the source of human sera clearly. We added the details in line 132. Reference sera for human brucellosis are not available presently. So, the 121 positive sera used for screening of peptides. According to the result, not all sera reacted strongly to these peptides, but each peptide can recognize a proper portion of these positive sera. We revised the data in Results section so that it can be clearly demonstrated (Table 1).

**4. L213-nanomodified p-ELISA (nano-p-ELISA) method comparison using traditional p-ELISA is described, however the details for nano-p-ELISA is not mentioned in the manuscript.**

**Response:** The method for nano-p-ELISA has been reorganized and described in Method Section (Line 167 to 213). The verifying data was displayed in Table 2. The nano-p-ELISA showed very similar efficacy in detecting human brucellosis as tra-p-ELISA, so we just described briefly the comparison result in Discussion section.

**5. Sample size is sufficient and population is also clearly described. The statistical analysis support the findings. No concerns about ethical and regulatory requirements.**

**Response:** Thank you very much for your comments. Actually, the study has been reviewed and approved by the Ethics Committee of Xuzhou Medical University, and related document was provided at the end of this cover letter.

**Reviewer #2:**

**I would suggest for the authors to add the Figure on the schematic diagram of developed paper-based ELISA for human brucellosis using multiepitope fusion protein.**

**Response:** Thank you very much for your suggestion, the schematic diagram of nano-ZnO modified paper-ELISA has been created, please see the Graphical Abstract Image.

**Results**

**Reviewer #1:**

**1. Results of LPS antigen are shown in figure 3 C and D, but details of LPS antigen are missing in method section and not mentioned elsewhere in the manuscript.**

**Response:** LPS antigen was provided by China Animal Health and Epidemiology Center. We had added the related information to Methods section, and please refer to the line 145 to 146.

**2. L236-Describe the positive sera used for screening of peptides? Is it the reference sera or from 121 known positive sera? Were all sera reacted to all 22 peptides?**

**Response:** We are very sorry that we did not describe the source of human sera clearly. We added the details in line 132. Reference sera for human brucellosis are not available presently. So, the 121 positive sera used for screening of peptides. According to the result, not all sera reacted strongly to these peptides, but each



peptide can recognize a proper portion of these positive sera. We revised the data in Results section so that it can be clearly demonstrated (Table 1)..

**3. Nanomodified p-ELISA (nano-p-ELISA) method comparison using traditional p-ELISA is unclear. In discussion L365, authors also mention comparison with traditional ELISA, please provide details.**

**Response:** Using 121 brucellosis positive sera and 90 negative sera, the sensitivity and specificity of nano-p-ELISA and tra-p-ELISA were evaluated and displayed in Table 2. As the two methods showed very similar efficacy in detecting human brucellosis, we just described briefly the comparison result in Discussion section.

**Reviewer #2:**

**Overall the results are clearly presented except that Figure 1. I would suggest the authors to replace with better quality of the graph to show clearly results of iELISA of each peptide identification-positive brucellosis serum.**

**Response:** Thank you for your suggestion, we have replaced the Figure 1 and with better quality of the graph.

**Conclusions**

**Reviewer #1:**

**1. This section needs to be revised with relevance to findings of the manuscript. L340-341-should it be part of results?**

**Response:** This section has been massively revised with relevance to the main findings. Some sentences apparently more suitable for Introduction or Result sections were removed from this section.

**2. L345-346- need justification for the statement for cross-reactivity.**

**Response:** After careful consideration, more accurate term to describe antigen's reactivity to negative sera is specificity. So, we deleted the word of *cross-reactivity* from the manuscript.

**3.L357-359 should be part of introduction and not discussion.**

**Response:** We made great change to the Discussion section, and these sentences has been deleted from the manuscript.

**Reviewer #2:**

**1. The conclusions are supported the data presented and the authors have explained the public health relevance for human brucellosis by using the developed method (paper-based ELISA on multiepitope fusion protein)**

**Response:** Thank you very much for your comments.

**Editorial and Data Presentation Modifications?**

Use this section for editorial suggestions as well as relatively minor modifications of existing data that would enhance clarity. If the only modifications needed are minor and/or editorial, you may wish to recommend "Minor Revision" or "Accept".

**Reviewer #1:**

**Authors need to carefully review terminology used in the manuscript. The term "antigenicity" is misleading, when throughout the manuscript the fusion peptide was used as a target for detection of antibodies in human sera.**

**Response:** Thank you very much for your comment. In this paper, we discussed mainly the capability of fusion peptides in serodiagnosis of human brucellosis. To avoid misunderstanding, we deleted the word of *antigenicity* from manuscript, and replace it with other words such as diagnostic effect.

**Reviewer #2: Minor revision**

**Summary and General Comments**

**Reviewer #1: (No Response)**

**Reviewer #2:**

**1. This study is important to be published as the developed method will help the human brucellosis diagnosis.**

**Response:** Thank you very much for your comment.

**2. The study is novel and has shown the better performance in terms of sensitivity and specificity of the test.**

**Response:** Thank you very much for your comment.

**3. Please include the details of the ethical approval documents.**

**Response:** Before we applied for this project from National Natural Science Foundation of China in 2018, the application has been reviewed and approved by the Ethics Committee of Xuzhou Medical University. We attached the original ethical documents in picture format as following. At the same time, we also provided the translated version for your consideration.

## 医学伦理审查报告

我校公共卫生学院拟开展“基于多表位融合蛋白的人布鲁氏菌病快速诊断技术研究”科研工作，该项目涉及布鲁氏菌病人血清标本的采集和检测，我校医学伦理委员会对该项目相关医学伦理学问题进行了审查。

### 项目信息：

项目名称：基于多表位融合蛋白的人布鲁氏菌病快速诊断技术研究

承担单位：徐州医科大学，项目负责人：殷德辉，职称：讲师

研究起止日期：2018年7月至2021年6月

### 涉及人体研究的主要内容：

本项目拟以布鲁氏菌病人血清为研究对象，利用生物信息学、融合蛋白、蛋白L和p-ELISA技术，建立一种快速、灵敏的人布鲁氏菌病血清学诊断新技术，为针对性地开展人兽共患传染病-布鲁氏菌病的防治提供有价值的科学依据和新的策略，具有重要的现实意义。

### 审查评议意见：

经我校医学伦理委员会审议，该研究的实验设计和实施方案充分考虑了安全性和公平性原则，研究内容不构成对研究人员等人群的危害，研究内容和结果不存在利益冲突。

### 结论：

该研究中，实验内容符合医学伦理学要求，不存在潜在风险，同意该项研究的工作按计划进行。

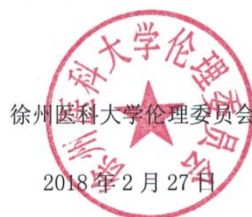

## Translated version:

### Medical Ethics Review Report

School of Public Health of our school intends to carry out the scientific research work of *Study on the rapid diagnosis technology of human brucellosis based on multiepitope fusion protein*. This work involves the collection and detection of serum samples from human. The Ethics Committee of Xuzhou Medical University carefully reviewed the related medical ethics issues about this project.

### Project information:

**Project name:** Study on rapid diagnosis technology for human brucellosis based on

multiepitope fusion protein

**Institute undertaking this project:** Xuzhou Medical University

**Project leader:** Yin Dehui, Lecturer

**Start and end dates:** From January 2019 to December 2021

**Main content involved in human research:**

This project intends to use the serum of brucellosis patients together with bioinformatics, fusion protein, protein L and p-ELISA technology to establish a rapid and sensitive new technology for the serological diagnosis of human brucellosis. It is of great significance for the prevention and treatment of the zoonotic infectious disease brucellosis in human, and also providing a valuable strategy for developing novel diagnostic technology for this disease.

**Review comments:**

After careful consideration by the Ethics Committee of Xuzhou Medical University, the research design and implementation fully comply with the principles of safety and fairness. The research content does not constitute any hazard factor to researchers and other populations, and there is no conflict of interest in the research content and results.

**Conclusion:**

In the study, the experimental content completely meets the requirements of medical ethics and there is no potential risk. Agreement is reached that this work can be carried out according to the plan.

Ethics Committee of Xuzhou Medical University

February 27, 2018

**Figure Files:**

While revising your submission, please upload your figure files to the Preflight Analysis and Conversion Engine (PACE) digital diagnostic tool, <https://pacev2.apexcovantage.com>. PACE helps ensure that figures meet PLOS requirements. To use PACE, you must first register as a user. Then, login and navigate to the UPLOAD tab, where you will find detailed instructions on how to use the tool. If you encounter any issues or have any questions when using PACE, please email us at [figures@plos.org](mailto:figures@plos.org).

**Response:** We have uploaded all our figure files to the Preflight Analysis and Conversion Engine.

**Data Requirements:**

Please note that, as a condition of publication, PLOS' data policy requires that you make available all data used to draw the conclusions outlined in your manuscript. Data must be deposited in an appropriate repository, included within the body of the manuscript, or uploaded as supporting information. This includes all numerical values that were used to generate graphs, histograms etc.. For an example see here: <http://www.plosbiology.org/article/info%3Adoi%2F10.1371%2Fjournal.pbio.1001908#s5>.

**Response:** All data for our figure has been upload as supporting information.

**Reproducibility:**

To enhance the reproducibility of your results, we recommend that you deposit your laboratory protocols in protocols.io, where a protocol can be assigned its own identifier (DOI) such that it can be cited independently in the future. Additionally, PLOS ONE offers an option to publish peer-reviewed clinical study protocols. Read more information on sharing protocols at [https://plos.org/protocols?utm\\_medium=editorial-email&utm\\_source=authorletters&utm\\_campaign=protocols](https://plos.org/protocols?utm_medium=editorial-email&utm_source=authorletters&utm_campaign=protocols)

**Response:** Considering that this manuscript has been released as a preprint at Research Square (<https://www.researchsquare.com/article/rs-291650/v1>, DOI: 10.21203/rs.3.rs-291650/v1), we did not deposit it in protocols.io.

Once again, thank you very much for your comments and suggestions.

Best wishes,

Dehui Yin

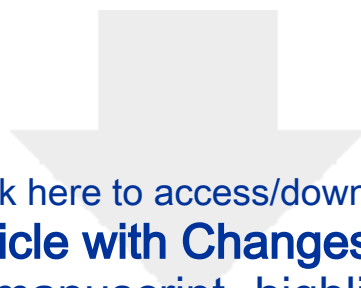

Click here to access/download

**Revised Article with Changes Highlighted**  
Revised manuscript- highlights.docx

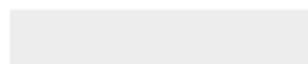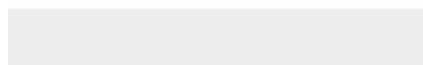

Supplement: pntd.0009695.s012.pdf [file pntd.0009695.s012.pdf]
